# Supplementary material
Source: PubMed Central journal article supplement (PMC9006771)
Supplement: NEJMoa2115869_data-sharing.pdf [file NEJMoa2115869_data-sharing.pdf]

## Data Sharing Statement

Reis G, Silva EASM, Silva DCM, et al. Effect of Early Treatment with Ivermectin among Patients with Covid-19. N Engl J Med. DOI: 10.1056/NEJMoa2115869.

| Question                                                            | Authors' Response                                                                                                       |
|---------------------------------------------------------------------|-------------------------------------------------------------------------------------------------------------------------|
| Will the data collected for your study be made available to others? | Yes                                                                                                                     |
| Would you like to offer context for your decision?                  | —                                                                                                                       |
| Which data?                                                         | Complete de-identified patient data set                                                                                 |
| Additional information about data                                   | —                                                                                                                       |
| How or where can the data be obtained?                              | ICODA <a href="https://icoda-research.org/research/our-research/">https://icoda-research.org/research/our-research/</a> |
| When will data availability begin?                                  | Immediately after publication                                                                                           |
| When will data availability end?                                    | —                                                                                                                       |
| Will any supporting documents be available?                         | —                                                                                                                       |
| Which supporting documents?                                         | Analytic/Statistical code. Informed Consent Form                                                                        |
| Additional information about supporting documents                   | —                                                                                                                       |
| How or where can supporting documents be obtained?                  | <a href="https://gatesopenresearch.org/articles/5-117">https://gatesopenresearch.org/articles/5-117</a>                 |
| When will supporting documents availability begin?                  | —                                                                                                                       |
| When will supporting documents availability end?                    | —                                                                                                                       |
| To whom will data be available?                                     | Researchers whose proposed use of the data has been approved.                                                           |
| For what type of analysis or purpose?                               | For a specified purpose.                                                                                                |
| By what mechanism?                                                  | After approval of a proposal.                                                                                           |
| Any other restrictions?                                             | None                                                                                                                    |
| Additional information                                              | None                                                                                                                    |

This statement was posted on March 30, 2022, at NEJM.org.
